# Supplementary material for: Change in screen time and overuse, and their association with psychological well-being among US-wide school-age children during the COVID-19 pandemic: analysis of the National Survey of Children’s Health (NSCH) years 2018–21
Source: Springer Nature journal article supplement (doi:10.1186/s13034-023-00688-7), 2024-01-13
Supplement: MOESM1 [file 13034_2023_688_MOESM1_ESM.pdf]

**Change in Screen Time and Overuse, and their Association with Psychological Well-being Among US-wide School-Age Children During the COVID-19 Pandemic: Analysis of the National Survey of Children's Health (NSCH) Years 2018-21**

Helena T. Wu<sup>a,b</sup>, Jiandong Li, PhD<sup>c</sup>, and Amy Tsurumi, PhD<sup>b,d,e\*</sup>

**Affiliations:**

<sup>a</sup>University of Chicago, Chicago, IL, USA

<sup>b</sup>Department of Surgery, Massachusetts General Hospital, Boston, Massachusetts, USA

<sup>c</sup>Central University of Finance and Economics, Beijing, China

<sup>d</sup>Harvard Medical School, Boston, Massachusetts, USA

<sup>e</sup>Shriners Hospitals for Children-Boston, Boston, Massachusetts, USA

\*Corresponding Author: Amy Tsurumi

([atsurumi@mgh.harvard.edu](mailto:atsurumi@mgh.harvard.edu); 50 Blossom St., Their 340, Boston, MA 02114, USA)

| NSCH survey variable (variable name according to the public use data file) and detailed description of the question and answer choices on the original survey                                                                                                                                                                                                                                                                   | Recoded variable used in this study                                                                                                                                                                                                                                                                        |
|---------------------------------------------------------------------------------------------------------------------------------------------------------------------------------------------------------------------------------------------------------------------------------------------------------------------------------------------------------------------------------------------------------------------------------|------------------------------------------------------------------------------------------------------------------------------------------------------------------------------------------------------------------------------------------------------------------------------------------------------------|
| <p><b>Recreational screen time (SCREENTIME).</b><br/>           "On most week days, about how much time did this child spend in front of a TV, computer, cellphone or other electronic device watching programs, playing games, accessing the internet or using social media, not including school work?"<br/>           Answer choices: 1 = Less than 1 hour, 2 = 1 hour, 3 = 2 hours, 4 = 3 hours or 5 = 4 or more hours.</p> | <p><b>Screen Time</b><br/>           0.5 = SCREENTIME of 1 (i.e. Less than 1 hour),<br/>           1 = SCREENTIME of 2 (i.e. 1 hour),<br/>           2 = SCREENTIME of 3 (i.e. 2 hours),<br/>           3 = SCREENTIME of 4 (i.e. 3 hours),<br/>           4 = SCREENTIME of 5 (i.e. 4 or more hours).</p> |
| <p><b>Ability to remain calm and in control when challenged (K7Q85_R).</b><br/>           "How often: Does this child stay calm and in control when faced with a challenge?"<br/>           Answer choices: 1 = Always, 2 = Usually, 3 = Sometimes, 4 = Never.</p>                                                                                                                                                              | <p><b>Not Calm</b><br/>           1 = K7Q85_R value of 3 or 4, indicating the child does not stay calm or in control,<br/>           0 = K7Q85_R value of 1 or 2, indicating the child does stay calm or in control.</p>                                                                                   |
| <p><b>Children who argue too much (K7Q70_R).</b><br/>           "How often: Does this child argue too much?"<br/>           Answer choices: 1 = Always, 2 = Usually, 3 = Sometimes, 4 = Never.</p>                                                                                                                                                                                                                              | <p><b>Argues Too Much</b><br/>           1 = K7Q70_R1 value of 1 or 2, indicating the child argues too much,<br/>           0 = K7Q70_R1 value of 3 or 4, indicating the child does not argue too much.</p>                                                                                                |
| <p><b>Difficulty making or keeping friends (MAKEFRIEND).</b><br/>           "Compared to other children his or her age, how much difficulty does this child have making or keeping friends?"<br/>           Answer choices: 3 = A lot of difficulty, 2 = A little difficulty, 1 = No difficulty.</p>                                                                                                                            | <p><b>Difficult to Make Friends</b><br/>           1 = MAKEFRIEND of 2 or 3, indicating the child has difficulty making or keeping friends,<br/>           0 = MAKEFRIEND of 1, indicating the child does not have difficulty making or keeping friends.</p>                                               |
| <p><b>Children who work to finish the tasks they start (K7Q84_R).</b><br/>           "How often: Does this child work to finish tasks they start?"<br/>           Answer choices: 1 = Always, 2 = Usually, 3 = Sometimes, 4 = Never.</p>                                                                                                                                                                                        | <p><b>Does Not Finish Tasks</b><br/>           1 = K7Q84_R value of 3 or 4, indicating the child does not finish tasks,<br/>           0 = K7Q84_R value of 1 or 2, indicating the child does finish tasks.</p>                                                                                            |
| <p><b>Children who show interest and curiosity in learning new things (K6Q71_R).</b><br/>           "How often: Does this child show interest and curiosity in learning new things?"<br/>           Answers choices: 1 = Always, 2 = Usually, 3 = Sometimes, 4 = Never.</p>                                                                                                                                                     | <p><b>Not Curious</b><br/>           1 = K6Q71_R value of 3 or 4, indicating the child does not show interest or curiosity,<br/>           0 = K6Q71_R value of 1 or 2, indicating the child does show interest and curiosity.</p>                                                                         |
| <p><b>Parent felt a child is difficulty to care for (K8Q31).</b><br/>           "During the past month, how often have you felt: that this child is much harder to care for than most children his or her age?"<br/>           Answers choices: 1 = Never, 2 = Rarely, 3 = Sometimes, 4 = Usually, 5 = Always.</p>                                                                                                              | <p><b>Difficult to Care</b><br/>           1 = K8Q31 value of 3, 4 or 5, indicating the child is difficult to care for,<br/>           0 = K8Q31 value of 1 or 2, indicating the child is not difficult to care for.</p>                                                                                   |
| <p><b>Been diagnosed with depression (K2Q32A)</b><br/>           "Has a doctor or other health care provider EVER told you that this child has depression?" Answers choices: 1 = Yes, 2 = No.</p>                                                                                                                                                                                                                               | <p><b>Depression</b><br/>           1 = K2Q32A value of 1, indicating a doctor or other health care provider has diagnosed that the child has depression,<br/>           0 = K2Q32A value of 2, indicating the child has not been diagnosed with depression.</p>                                           |
| <p><b>Been diagnosed with anxiety (K2Q33A)</b><br/>           "Has a doctor or other health care provider EVER told you that this child has anxiety?" Answers choices: 1 = Yes, 2 = No.</p>                                                                                                                                                                                                                                     | <p><b>Anxiety</b><br/>           1 = K2Q33A value of 1, indicating the child ever had anxiety,<br/>           0 = K2Q33A value of 2, indicating the child has never had anxiety.</p>                                                                                                                       |

**Table S1: Description of NSCH survey questions and answer choices and variables used in this study**

| PWIS   | Values | Definition                                                                                                                                                                                                              |
|--------|--------|-------------------------------------------------------------------------------------------------------------------------------------------------------------------------------------------------------------------------|
| PWBIS1 | 0 - 6  | Sum of six symptom dichotomous variables excluding depression and anxiety ( <i>Not Calm, Argues Too Much, Difficult to Make Friends, Does Not Finish Tasks, Not Curious, and Difficult to Care</i> )                    |
| PWBIS2 | 1 or 0 | 1 = has at least one of the eight symptoms ( <i>Not Calm, Argues Too Much, Difficult to Make Friends, Does Not Finish Tasks, Not Curious, Difficult to Care, Depression, or Anxiety</i> ), or<br>0=none of the symptoms |

**Table S2: Description of the construction of the well-being scores, PWBIS1 and PWBIS2.**

| GLS models for the PWBIS1 outcome                 |                                                                                                                                                                                                                                                                                                                                                                                                                                                                                                                                                                                                                                |
|---------------------------------------------------|--------------------------------------------------------------------------------------------------------------------------------------------------------------------------------------------------------------------------------------------------------------------------------------------------------------------------------------------------------------------------------------------------------------------------------------------------------------------------------------------------------------------------------------------------------------------------------------------------------------------------------|
| <b>Model1</b>                                     | $PWBIS1_{Model1} = \alpha + \beta_1 \text{ Screen Time/Overuse} + \beta_2 \text{ Age} + \beta_3 \text{ Sex-male} + \beta_4 \text{ Race-Black}$ $+ \beta_5 \text{ Race-American Indian or Alaska native} + \beta_6 \text{ Race-Asian}$ $+ \beta_7 \text{ Race-Hawaiian or Pacific Islander} + \beta_8 \text{ Race-Other} + \beta_9 \text{ Race-Two or More Races}$ $+ \beta_{10} \text{ Ethnicity-Hispanic or Latino} + \beta_{11} \text{ Poverty Ratio} + \mathcal{E}$                                                                                                                                                         |
| <b>Model2</b>                                     | $PWBIS1_{Model2} = \alpha + \beta_1 \text{ Screen Time/ Overuse} + \beta_2 \text{ Pandemic 2020} + \beta_3 \text{ Screen Time/ Overuse} * \text{Pandemic 2020}$ $+ \beta_4 \text{ Age} + \beta_5 \text{ Sex-male} + \beta_6 \text{ Race-Black} + \beta_7 \text{ Race-American Indian or Alaska native}$ $+ \beta_8 \text{ Race-Asian} + \beta_9 \text{ Race-Hawaiian or Pacific Islander} + \beta_{10} \text{ Race-Other}$ $+ \beta_{11} \text{ Race-Two or More Races} + \beta_{12} \text{ Ethnicity-Hispanic or Latino} + \beta_{13} \text{ Poverty Ratio} + \mathcal{E}$                                                    |
| Logistic regression models for the PWBIS2 outcome |                                                                                                                                                                                                                                                                                                                                                                                                                                                                                                                                                                                                                                |
| <b>Model3</b>                                     | $PWBIS2_{Model3} = \alpha + \beta_1 \text{ Screen Time/ Overuse} + \beta_2 \text{ Elementary School} + \beta_3 \text{ Junior School} + \beta_4 \text{ Sex-male}$ $+ \beta_5 \text{ Race-Black} + \beta_6 \text{ Race-American Indian or Alaska Native} + \beta_7 \text{ Race-Asian}$ $+ \beta_8 \text{ Race-Hawaiian or Pacific Islander} + \beta_9 \text{ Race-Other} + \beta_{10} \text{ Race-Two or More Races}$ $+ \beta_{11} \text{ Ethnicity-Hispanic or Latino} + \beta_{12} \text{ Poverty Ratio} + \mathcal{E}$                                                                                                       |
| <b>Model4</b>                                     | $PWBIS2_{Model4} = \alpha + \beta_1 \text{ Screen Time/ Overuse} + \beta_2 \text{ Pandemic 2020} + \beta_3 \text{ Screen Time/ Overuse} * \text{Pandemic 2020}$ $+ \beta_4 \text{ Elementary School} + \beta_5 \text{ Junior School} + \beta_6 \text{ Sex-male} + \beta_7 \text{ Race-Black}$ $+ \beta_8 \text{ Race-American Indian or Alaska Native} + \beta_9 \text{ Race-Asian}$ $+ \beta_{10} \text{ Race-Hawaiian or Pacific Islander} + \beta_{11} \text{ Race-Other} + \beta_{12} \text{ Race-Two or More Races}$ $+ \beta_{13} \text{ Ethnicity-Hispanic or Latino} + \beta_{14} \text{ Poverty Ratio} + \mathcal{E}$ |

**Table S3: Description of the GLS and logistic regression models constructed.**
